# Supplementary material for: Cultivating harmony across borders: Chinese cultural values and corporate communication in global contexts
Source: Frontiers journal article supplement (doi:10.3389/fcomm.2025.1650733), 2025-10-27
Supplement: Table_1.docx [file Table_1.docx]

**Appendix**

List of 200 Corporations

| No. | Enterprise name | Ownership | Scope |
| --- | --- | --- | --- |
| 1 | Angel Yeast | State-Owned | Yeast biotechnology |
| 2 | AVIC INTL | State-Owned | Aviation business, high-end manufacturing, overseas public service, and service & trade |
| 3 | Bank of China (BOC) | State-Owned | Financing |
| 4 | BBA | Private | R&D, procurement, production, sales and after-sales services of BMW automobiles |
| 5 | Beijing TRT Group | State-Owned | Traditional Chinese medicine |
| 6 | BGI Genomics | Private | Clinical molecular diagnostic solutions and high-throughput sequencing (NGS) research services |
| 7 | BGRIMM GROUP | State-Owned | Research, development, and engineering services |
| 8 | Boomplay | Private | Music & video streaming and download services |
| 9 | CBVAC Technology Co., Ltd | Private | the vacuum field |
| 10 | CGCOC Group | State-Owned | Consulting planning, investment operation, overseas infrastructure construction, and logistics & trade |
| 11 | Chai Tang Restaurant | Private | Authentic Chinese fine-dining with menu adaptations |
| 12 | Chery Automobile Co., Ltd. | Private | Exportation of complete vehicles, CKD parts, engines, manufacturing technology and equipment |
| 13 | Chifeng Gold | Private | Gold and polymetallic mining, metallurgical processing, sales, and comprehensive recycling of waste electrical & electronic equipment |
| 14 | China Certification & Inspection (Group) Co., Ltd. (CCIC) | State-Owned | Mineral inspection & testing, pre-shipment inspection, PVOC/SONCAP conformity assessment, agriculture/food inspection and customs certification |
| 15 | China Civil Engineering Construction Corporation (CCECC) | State-Owned | Railway, highway, bridge, urban rail and other transportation infrastructure EPC, plus investment, operation, real-estate, industrial parks, trade & logistics |
| 16 | China Communications Construction Company | State-Owned | Service provider of infrastructure |
| 17 | China ComService International (CCSI) | State-Owned | Telecom infrastructure, network/property/supply-chain management, and system integration & smart-city solutions |
| 18 | China Datang Corporation Limited(CDT) | State-Owned | Power generation, coal & coal-chemical, finance, environmental protection, trade & logistics and overseas energy projects |
| 19 | China Derry Group | Private | Real estate development, international engineering contracting |
| 20 | China Export & Credit Insurance Corporation (SINOSURE) | State-Owned | Credit insurance, overseas investment insurance, bonds & guarantees, domestic trade credit insurance, reinsurance, accounts-receivable management and credit information consultancy |
| 21 | China General Nuclear Power Company | State-Owned | Nuclear power, nuclear fuel, wind and solar development, EPC and O&M |
| 22 | China-Africa TEDA Investment Co., Ltd. | State-Owned | Investment and operation management |
| 23 | China Gold International Resources Corp. Ltd. | State-Owned | Mineral operation & production |
| 24 | China Harbour Engineering Company Nigeria Limited (CHEC) | State-Owned | Marine engineering, ports, airports, dredging, roads & bridges, railways, municipal works, comprehensive urban development, ecological protection, pipe networks and green power projects |
| 25 | China Henan International Cooperation Group (CHICO) | State-Owned | International EPC contracting, consulting, labor export, mining development, agriculture investment, government-aided infrastructure overseas, and automobile dealership & information services |
| 26 | China Huanqiu Contracting & Engineering Co., Ltd. | State-Owned | R&D, consulting, technology licensing, operation & maintenance, financing, etc |
| 27 | China Hway Group | Private | General contracting of international projects, exploitation of resources and trade |
| 28 | China Jiangxi International Economic and Technical Cooperation Co.,Ltd. (CJIC) | State-Owned | International EPC/turnkey infrastructure, mineral exploitation, foreign labor service, real estate, architectural design |
| 29 | China Jushi | State-Owned | Manufacture and sales of fiberglass |
| 30 | China Kingho | State-Owned | Coal mining, washing and dressing |
| 31 | China Longyuan | State-Owned | New energy |
| 32 | China Machinery Engineering Corporation (CMEC) | state-owned | Integrated engineering contracting services |
| 33 | China Mobile International Limited (CMI) | State-Owned | International fixed-line, mobile, data, cloud, IDC and integrated digital telecom services |
| 34 | China National Agricultural Development Group Co., Ltd. | State-Owned | Diesel manufacturing and port construction |
| 35 | China National Machinery Foreign Economic and Technical Cooperation Co., Ltd. (CMIC) | State-Owned | Turnkey exportation of complete industrial plants and technology import/export |
| 36 | China National Machinery Import & Export Corporation (CMC) | State-Owned | Importing high-end mechanical & electrical equipment and technology, and exporting turnkey industrial plants, low-carbon & green energy projects |
| 37 | China National Machinery Industry Corporation (Sinomach) | State-Owned | Turnkey EPC, financing & O&M for industrial, power, infrastructure etc. |
| 38 | China National Petroleum Corporation (CNPC) | State-Owned | Oil & gas exploration and production, refining and chemicals, marketing, new energies, engineering services and capital/finance |
| 39 | China Poly Group Corporation Ltd. | State-Owned | Defense & dual-use equipment trade, real-estate development, civil-explosives production, culture & arts business, light-industry engineering, ICT and financial services |
| 40 | China Railway Construction Corporation Limited (CRCC) | State-owned | Project contracting and engineering |
| 41 | China Railway Engineering Corporation | State-Owned | Contracting architectural engineering |
| 42 | China Road and Bridge Corporation (CRBC) | State-Owned | EPC/PPP contracting and investment of roads, bridges, ports, railways, airports, tunnels, real estate and industrial parks |
| 43 | China Security Technology Group | Private | Integrated overseas security solutions on-site guarding, VIP protection, mobile escort, risk consulting, safety training, and tech-driven situational awareness |
| 44 | China Shandong International Economic &Technical Cooperation Group Ltd (CSI) | Mixed-Ownership | International contracted engineering, China-aid project, international human resource cooperation and exchange, etc |
| 45 | China Southern Airlines | State-Owned | Passenger/cargo air transport and supporting services |
| 46 | China State Construction Engineering Corporation(CSCEC) | State-Owned | Housing construction, infrastructure, real-estate investment & development, design & survey, and green building |
| 47 | China State Farms Agribusiness (G) Corp. Tanzania Ltd (CSFACOT) | State-Owned | Sisal planting, processing and sales |
| 48 | China Telecom Global (CTG) | State-Owned | Global fixed-line, mobile, broadband, cloud computing, IDC, ICT and integrated digital services |
| 49 | China Unicom Global | State-Owned | Nationwide & global fixed-line, mobile, broadband, cloud computing, big data, ICT and integrated digital information services |
| 50 | China XinXing Construction & Development Co., Ltd. | State-Owned | Military confidential business consulting service |
| 51 | China Zhonghao Nigeria Limited. | Private | Overseas EPC contracting of roads, bridges, municipal & building works, water boreholes, water/sewage-treatment plants, mineral exploration and real-estate development |
| 52 | China's Shenzhen Xinguodu Technology Co., Ltd | private | Electronic payment technologies |
| 53 | CHINASTAR | Private | Construction steel structure, curtain wall develop, construction installation and after-sales service |
| 54 | Chinaville Chinese restaurant | Private | Authentic Chinese cuisine, fine dining and private dining services |
| 55 | Chinese Xinjiang Zhongtai Chemical | Private | The production and export of PVC resin, ionic membrane caustic soda, viscose fiber, BDO, PTA and other chemical products for textiles, building materials, defense and other industries |
| 56 | Chinige Technology Services (NIG) Ltd. | Private | Manufacturing, sales and leasing of small and large agricultural and engineering machinery |
| 57 | CHINT | Private | Green energy, intelligent electricals & smart-low-carbon solutions, offering turnkey packages |
| 58 | Choice International | Private | International branding and marketing operator |
| 59 | Choice Int’l Forwarding Co., Ltd | Private | Logistics services |
| 60 | Chongqing Haifu Medical Technology Co. Ltd. | Private | Non-invasive ultrasound therapeutic systems for both malignant and benign tumors |
| 61 | Chongqing RATO Holding Group Co. Ltd. | Private | R&D and manufacturing of general-purpose gasoline/diesel engines, motorcycles, generators and intelligent power equipment |
| 62 | CIG Motors Company Limited | State-Owned | International EPC contracting, consulting, labor export, agriculture/mining investment |
| 63 | CJ Smart Cargo Group | Private | Integrated smart logistics solutions |
| 64 | CLOUDWALK | Private | AI finance, AI governance, AI transportation and AI business solutions |
| 65 | CMOC Group Limited (CMOC) | Private | Mining and processing of base and rare metals and mineral trading |
| 66 | CNCEC | State-Owned | High-end chemicals and advanced material |
| 67 | CNOOC International | State-Owned | Offshore & onshore conventional oil & gas, unconventional and oil sands E&P, plus associated investment, engineering and operation services |
| 68 | CPE | State-Owned | Integrated engineering and construction solutions |
| 69 | CRRC Corporation Limited (CRRC) | state-owned | Supplier of rail transit equipment |
| 70 | CTG | State-Owned | Large-scale hydropower development and operation |
| 71 | Development reimagined | Private | The global health, agriculture and humanitarian sectors |
| 72 | DEWE Security Service Group | Private | Integrated overseas security services -- advisory, training, on-site guarding and technology solutions |
| 73 | DIDI | Private | App-based transporting services |
| 74 | Divine New Energy | Private | Design & distribution of portable solar lights and customized off-grid solar systems |
| 75 | Dongfeng Motor Corporation Limited | State-Owned | Automobile-related products and services |
| 76 | Eastern Industry Zone | Private | Cement, footwear, automobile assembly, steel rolling, textile & garment |
| 77 | Ekemp International | private | Digital biometric security identification |
| 78 | EL-ALAN Construction Company (Nigeria) Limited | Private | Turnkey design-build, MEP, property development, facility management & logistics for residential, commercial and industrial projects |
| 79 | ENERGY CHINA | State-Owned | Holistic solutions and full-chain services |
| 80 | ESAVIOR GREEN ENERGY(Esavior) | Private | Design and manufacture of LED & IoT solar street lights, solar power systems, wind-solar hybrid kits and green energy components |
| 81 | Foton Motor Group | Private | Full-range commercial vehicles and new-energy mobility solutions covering battery-electric, hybrid and hydrogen fuel-cell powertrains, plus integrated hydrogen production, storage, transportation and refueling infrastructure |
| 82 | GCIGC/CGICO | State-Owned | Labor service collaboration, pharmaceutical manufacturing |
| 83 | GEO Chinese Company | State-Owned | Energy conservation and environmental protection |
| 84 | Golden Gate Restaurant | Private | A wide variety of Chinese and Asian cuisine |
| 85 | GOODDOCTOR GROUP | Private | Biopharmaceuticals |
| 86 | Greenroad International Logistics | Private | Engineering project logistics and contract logistics |
| 87 | Guangzhou Kusing Generator Co., Ltd | Private | Design and manufacture of 10–2,000 kVA diesel generator sets for hotels, highway construction, mining, oil exploration and disaster relief |
| 88 | Hainan Airlines | Private | Global passenger/cargo flights and aviation supporting services |
| 89 | Hainan Zhongchen Biological Engineering Company Limited | Private | Large-scale organic Aloe vera cultivation, GMP-compliant concentrate and freeze-dried powder processing, and export of organic aloe raw materials |
| 90 | Haishan Group International | Private | Transnational investment and global management |
| 91 | Hangzhou Chief Technology Co., Ltd. | Private | Healthcare product series and anti-insect product series |
| 92 | Hangzhou Water Treatment Technology Development Center | State-Owned | Membrane-based water treatment technology |
| 93 | Harbin Electric Corporation | State-Owned | R&D, manufacturing and EPC of nuclear, hydro, coal, gas, ship power plants and power-generation equipment |
| 94 | Henan Guoji Industry Group Co., Ltd. | Mixed-Ownership | Construction and installation, real estate development and overseas development |
| 95 | Henan Rebecca | Private | R&D, production and sale of 100% human hair weaving, synthetic hair weaving, wigs, hairpieces, men’s toupees and mannequins |
| 96 | Hengtong Group | Private | Fibre optical communication, power transmission, EPC turnkey service and maintenance |
| 97 | Herocean Group | Private | International supply chain services |
| 98 | Hikvision | Private | AIoT-powered security products, integrated solutions and intelligent applications, covering cities, transport, retail, smart home, robotics, medical imaging and more fields |
| 99 | Hisense | State-Owned | Consumer electronics and home appliances, with R&D and manufacturing |
| 100 | HNAC Technology Co., Ltd. | Private | Overall solutions for water conservancy |
| 101 | HOLLEYINTL | Private | Supply chain services |
| 102 | Honghua | State-Owned | Land drilling rigs, digital drilling rigs, accessories of drilling rigs |
| 103 | HUAJIAN GROUP | Private | R&D, manufacturing and global sales of mid-to-high-end women’s leather shoes, plus integrated light-industry parks for footwear supply chain & export |
| 104 | HUAWEI | Private | Integrated ICT infrastructure, telecom networks, IT, smart devices, and cloud services |
| 105 | Huaxin Zhong An Security Group | Private | Security and risk-management solutions—threat assessment, on-site guarding, maritime security, compliance advisory |
| 106 | Huayou Cobalt | Private | Research and development, manufacturing business |
| 107 | Humanwell | Private | Healthcare |
| 108 | ICBC | State-Owned | Financing |
| 109 | Jade Palace Chinese Cuisine | Private | Authentic Chinese cuisine, dim sum, buffet and Chinese brunch services |
| 110 | Jereh Group | Private | High-end oil & gas equipment, environmental solutions, new energy, and industrial internet services |
| 111 | Jiangsu Construction Engineering Group Co., LTD (JSCE) | Private | Design-build, EPC and professional contracting of high-rise buildings, large industrial plants, municipal works, steel structures, decoration, electromechanical installation |
| 112 | Jiangsu Overseas Group Co., Ltd. | State-Owned | Trade, chemical warehousing logistics, overseas investment and financing services |
| 113 | Jiangsu Sainty International Group (JMET Corporation) | State-Owned | Import/export & domestic trade of steel, metals, chemicals, consumer goods etc. |
| 114 | Jiangsu Yulong Group | Private | Large-diameter double-submerged arc welded (SAWH/SAWL), JCOE, RBE and square/rectangular steel pipes with anti-corrosion coatings |
| 115 | Jiangsu　Geology　&　Engineering　Co.Ltd, | State-Owned | Infrastructure pipeline |
| 116 | Jiu Hua Nigeria Co. Ltd | Private | Manufacturing and sales of doors, glass, aluminium, stainless steel, wrought iron, furniture and sofa products |
| 117 | KEDA | Private | Wall material machinery, stone machinery, building materials, etc. |
| 118 | Kerui Company | Private | R&D of high-end oil and oil field integration services |
| 119 | Kilimall | Private | Electronics, fashion, home goods, and groceries |
| 120 | KPC Pharmaceuticals | State-Owned | Innovative natural botanical drugs |
| 121 | Le Bunna | Private | Coffee processing, international trading. |
| 122 | Lenovo | Private | PCs, smartphones, servers, smart devices, software, services and data-center solutions |
| 123 | Longrich Bio-Science Co. Ltd (Longrich) | Private | R&D, manufacturing and direct sales of health care, cosmetic/skin care, household cleaning and pet care products |
| 124 | Mainland Group | Private | Agricultural commodity and trading |
| 125 | Midea Group | Private | Home appliance and digital innovation |
| 126 | More | Private | AI-driven social media and high-quality content sharing platform with interest-based group functions |
| 127 | MSCcargo | Private | Container shipping |
| 128 | Mutual Commitment Company Ltd | Private | Turnkey EPC/O&M for energy, civil engineering, healthcare etc., plus industrial parks, real estate & logistics |
| 129 | Nanchang Foreign Engineering Corporation | State-Owned | Overseas EPC (housing, municipal, steel structure, decoration) and labor export |
| 130 | NetEase | Private | Online games, intelligent learning, music streaming, e-commerce, email, news portal, live video, and private-label lifestyle products |
| 131 | New Hope Group Co., Ltd. | Private | Modern agriculture and food industry |
| 132 | Ningxia Tianyuan Manganese Industry Group | Private | Building materials, commerce, and related services |
| 133 | North China Construction Nigeria Limited (NCC) | State-Owned | Large-scale infrastructure EPC and strategic China-Africa government-backed projects |
| 134 | Northern International Group (NIG) | State-Owned | Import & export, domestic wholesale/retail, warehousing & logistics, overseas engineering contracting, real estate, and trade-related services |
| 135 | OPPO | Private | Smart-device design, ColorOS software ecosystem, and global R&D, manufacturing & sales |
| 136 | PALMPAY | Private | Mobile payments, digital wallets, and financial ecosystem services |
| 137 | PetroChina Company | State-Owned | Upstream & downstream oil & gas exploration, production, refining, marketing, natural gas sales, and new energy |
| 138 | Pinggao Group | State-Owned | R&D, design, manufacturing, sales, testing of power transmission and distribution equipment |
| 139 | Poly Sinolight | Private | Light industry |
| 140 | Power China Sichuan Electronic Power Engineering Co., LTD | State-Owned | Planning, construction, operation and maintenance and financing services of power engineering |
| 141 | PowerChina Guizhou Engineering Co.,Ltd. | State-Owned | Thermal power, new energy, infrastructure, traditional extension |
| 142 | Qingdoo Sunflare New Energy Company Ltd | Private | Solar panels, home systems, LED lights and OEM/ODM solar products |
| 143 | RAYAL INDUSTRIAL | Private | Building porcelain/ceramic tiles, supplying SA wholesalers |
| 144 | Reanda | Private | Audit & assurance, tax, consulting service |
| 145 | Sansheng | Private | Global building materials industry and pharmaceutical health field |
| 146 | SANY | Private | High-quality engineering machines and services |
| 147 | SDHS | State-Owned | Comprehensive infrastructure service |
| 148 | Sentuo Group | Private | Trading, rating, logistics, manufacturer’s storage, management & after-sale |
| 149 | SEPCO Electric Power Construction Corporation | State-Owned | The full-chain EPC+O&M of power, oil & gas/petrochemical, renewable energy, energy-saving & environmental protection, and infrastructure projects |
| 150 | SEPCOⅢ Electric Power Construction Corporation (SEPCOⅢ) | Private | EPC/EPCO/BOT/BOO/PMC delivery of thermal, nuclear, wind, solar, biomass, desalination and substation plants |
| 151 | Shandong Weiqiao Pioneering Group.,Ltd | Private | Textiles, dyeing, apparel, home textiles, thermal power |
| 152 | Shanghai Construction Group (SCG) | State-Owned | Design-build and EPC of high-rise buildings, large bridges, light-rail, public culture & sport venues |
| 153 | Shanxi Construction Engineering (Group) Corporation | State-Owned | Design-build/EPC, manufacturing, and real estate |
| 154 | Shaoxing Mina Textile Co., Ltd | Private | The fabric for elastic women trousers/dress and lady's blouse |
| 155 | Shenzhen Power Solution Limited | Private | Design, manufacture and distribution of certified solar reading lights |
| 156 | SIMI MOBILE | Private | R&D, Production, and Sales of Wireless Terminal Products |
| 157 | SINOHYDRO Corporation Limited | State-Owned | Water-conservancy and hydropower construction, plus turnkey infrastructure services |
| 158 | Sinoma (Suzhou) | State-Owned | Cement production line |
| 159 | Sinoma International Engineering | State-Owned | EPC turnkey contracting, overseas investment, and production & operation management in cement, glass, power engineering, and diversified industrial/municipal projects (housing, roads, bridges, waste incineration, etc.) |
| 160 | SINOSOAR | Private | Solar hybrid and off grid fields |
| 161 | Sinosteel MECC | State-Owned | Industrial engineering & service, high-tech businesses |
| 162 | Sinotrans | State-Owned | Agency and related business, supply chain logistics and e-business |
| 163 | SINOVAC | Private | R&D, manufacturing, and commercialization of vaccines |
| 164 | SPH | State-Owned | Healthcare services |
| 165 | StarTimes | Private | Digital-TV and online streaming network operation, content provision, and system integration |
| 166 | Sunda International Group | Private | Ceramics, sanitary ware, hardware, daily chemicals & personal care products |
| 167 | TBEA | Mixed-Ownership | Clean energy solutions for the global energy industry |
| 168 | TBEA Sunoasis | Private | Turnkey PV and wind EPC plus O&M, manufacturing PV inverters, energy-storage systems and smart micro-grid solutions |
| 169 | TCL | Private | Display panels, smart TVs, mobile devices and home comfort products |
| 170 | Tiantang Group | Private | Park construction, hotel catering and tourism, manufacturing, real estate development |
| 171 | TIENS GROUP | Private | Health-food, wellness appliances, skincare and household products |
| 172 | Transsion | Private | Smart phones, digital accessories, home appliances and after-sales service |
| 173 | Transsnet | Private | Mobile Internet services |
| 174 | Transtech Engineering Corporation (TRANSTECH) | State-Owned | International EPC/BOT/BT/BOOT contracting of civil & industrial buildings, highways, railways, hydraulic works, ports, urban transit, airports, tunnels, bridges and decoration, plus import-export, overseas investment and labor cooperation |
| 175 | Tsingshan Holdings | Private | Stainless-steel smelting and rolling plus nickel and new-energy battery materials for energy-storage systems and electric vehicles |
| 176 | Tugrow1688 logistics | Private | China-to-Nigeria e-commerce logistics |
| 177 | Twyford | Private | Manufacturing and sales of affordable ceramic tiles |
| 178 | UNIVAL Group | Private | Chemical/pharma/food product trade/manufacturing, plus new health products |
| 179 | Vitex China Nigeria Limited- Tractor Dealer in Lagos, Nigeria | Private | Tractor sales, assembling, manufacturing, and after-sales service of VT-D12 tractors and farm equipment |
| 180 | VSKIT | Private | Short video creation and sharing platform |
| 181 | Wangkang Holding Group | Private | Building materials |
| 182 | Wanxin Doors & Windows Manufacturing | Private | Manufacturing and exporting |
| 183 | Wepon Medical Technology Co., Ltd. | Private | Hospital engineering services |
| 184 | Wynca Group | Private | Crop protection, silicon-based new materials and new energy materials |
| 185 | XAG | Private | Drones, robots, autopilot, artificial intelligence, and Internet-of-things |
| 186 | Xiaomi | Private | Smartphones, consumer AIoT devices, internet services and smart manufacturing |
| 187 | Xinlan Group | State-owned | Producing rubber sheathed cables |
| 188 | Xuzhou Construction Machinery Group Co, Ltd. (XCMG) | State-Owned | R&D, manufacture and sale of full-line construction machinery |
| 189 | Yewhing | Private | Commerce and trade supply chain, and electrical engineering contract, international trade and investment |
| 190 | Yiwugo | Private | Direct purchase of quality goods from the source and manufacturers |
| 191 | Yuan Long Ping High-Tech Agriculture Co.,Ltd. | Mixed-Ownership | Hybrid rice seed business |
| 192 | Zhejiang Dinson Holding Co., Ltd. | Private | Chrome ore mining, high-carbon ferrochrome smelting, stainless steel wire rod, coils, bars and billets |
| 193 | Zhejiang Kangle Pharmaceutical Co., Ltd. | Private | The R&D, manufacture and sale of APIs and Corresponding finished-dosage forms |
| 194 | ZHONGMEI Engineering Group Ltd. | State-Owned | International EPC contracting of roads, housing, urban rail, mines, hydropower, mechanical & electrical installation, geological exploration, real-estate development |
| 195 | Zhongxing Telecom Equipment South Africa (ZTE South Africa) | State-Owned | Integrated telecom and ICT solutions |
| 196 | ZNSHINE SOLAR | Private | The R&D, manufacturing, sales and EPC services |
| 197 | Zonergy Corporation | Private | smart microgrid integrated solutions |
| 198 | Zonsen Group | Private | Small- and medium-power systems, new-energy vehicle powertrains |
| 199 | ZTT Group | Private | Marine equipment, renewable energy |
| 200 | ZXAUTO | Private | Passenger vehicles, commercial vehicles and auto-parts production |
